# Supplementary material for: Cerium(IV) chitosan-based hydrogel composite for efficient adsorptive removal of phosphates(V) from aqueous solutions
Source: PubMed Central journal article supplement (PMC10421956; doi:10.1038/s41598-023-40064-1), 2023-08-11
Supplement: 41598_2023_40064_MOESM1_ESM.pdf [file 41598_2023_40064_MOESM1_ESM.pdf]

# Cerium(IV) chitosan-based hydrogel composite for efficient adsorptive removal of phosphates(V) from aqueous solutions

Łukasz Wujcicki, Tomasz Mańdok, Wiktoria Budzińska-Lipka, Karolina Pawłusińska, Natalia Szozda, Gabriela Dudek, Krzysztof Piotrowski, Roman Turczyn, Maciej Krzywiecki, Alicja Kazek-Kęsik & Joanna Kluczka\*

\*email: joanna.kluczka@polsl.pl

## Supplementary Information

### SEM-EDS

Table S1. The average diameter of the pore size in chitosan-based hydrogel, modified with cerium(IV) - before and after phosphates(V) adsorption.

| Hydrogel type | Average pore diameter, $\mu\text{m}$ |
|---------------|--------------------------------------|
| CTS           | $6.69 \pm 0.43$                      |
| Ce-CTS        | $6.36 \pm 0.67$                      |
| P-Ce-CTS      | $6.97 \pm 0.41$                      |

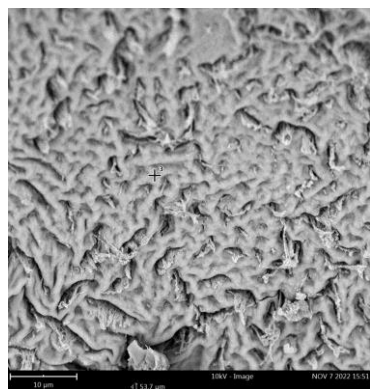

Figure S1. The wrinkled maze-like structures of the freeze-dried bead's surface of the chitosan-based hydrogel.

## XRD

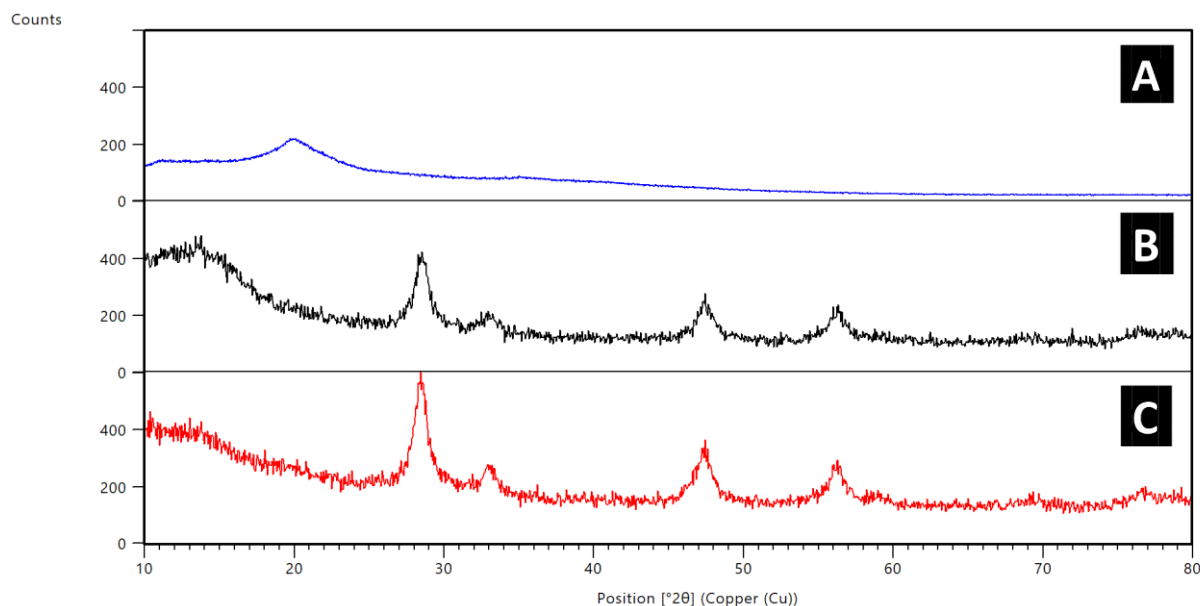

Fig. S2 The XRD spectra of the chitosan (A - blue), chitosan modified with cerium(IV) before (B - black) and after phosphates(V) adsorption (C - red)

## Phosphate(V) adsorption

Adsorption capacity of the cerium-modified chitosan-based adsorbent in respect to phosphates(V), as well as the percentage of phosphates(V) removal, were calculated based on the (S1) and (S2):

$$q_t = \frac{(C_0 - C_t) \cdot V}{m_s} \quad (S1)$$

$$R\% = \frac{(C_0 - C_t)}{C_0} \cdot 100\% \quad (S2)$$

In equations (S1) and (S2) parameter  $q_t$  [mg/g] is the equilibrium mass of phosphorus, corresponding to the given time of the process  $t$ , chemically as phosphates(V), adsorbed on a unit mass of adsorbent,  $R\%$  is the percentage of phosphorus removal from solution,  $C_0$  and  $C_t$  [mg/dm<sup>3</sup>] are the initial and corresponding to the given time of the process  $t$  concentration of phosphorus in the chemical form of phosphates(V) in solution, respectively,  $V$  [dm<sup>3</sup>] is the volume of phosphates(V) aqueous solution, while  $m_s$  [g] is the mass of dry adsorbent used in the system.

Procedure of the point of zero charge ( $pH_{pzc}$ ) determination for the Ce-CTS adsorbent was the following<sup>S1 [111]</sup>. To a series of polyethylene bottles containing 40 cm<sup>3</sup> of 0.01 M KNO<sub>3</sub> solution each, different volumes of either 0.1 M HCl or 0.1 M NaOH solution, appropriately, were added to obtain pH values from 4 to 10. The total volume of solution in each bottle was 50 cm<sup>3</sup> by adequate addition of demineralized water (Millipore Elix 10 system (Merck Millipore)). After 2 h of equilibration, the pH values ( $pH_i$ ) were identified and 1 g of the hydrogel beads to each solution was added. After 72 h of equilibration with discontinuous (in cycles 15 min. per h) shaking, the pH value of the supernatant liquid in each bottle was identified ( $pH_f$ ). The difference between  $pH_i$  and  $pH_f$  (as  $\Delta pH$ ) was then plotted against each tested  $pH_i$ . The solution's pH at which  $\Delta pH = 0$  means "the  $pH_{pzc}$ " of the sample.

**Kinetics** <sup>72,73</sup>

Pseudo-first-order kinetic model (S3):

$$\log(q_e - q_t) = \log q_e - \frac{k_1}{2.303} t \quad (S3)$$

Pseudo-second-order kinetic model (S4):

$$\frac{t}{q_t} = \frac{1}{k_2 q_e^2} + \frac{1}{q_e} t \quad (S4)$$

where:  $t$  is the time of an adsorption process (representing interfacial contact time),  $k_1$  and  $k_2$  are the rate constants for the pseudo-primary and pseudo-secondary kinetic models, respectively,  $q_e$  is the adsorption capacity at equilibrium, and  $q_t$  is the adsorption capacity effect for a given interphase contact time (usually termed: practical equilibrium capacity).

Intraparticle diffusion model by Weber and Morris (S5) <sup>78,79,80,81,82</sup>:

$$q_t = K_{i\ diff} t^{0.5} + C \quad (S5)$$

where:  $q_t$  is the adsorption capacity of phosphorus for time  $t$  [mg/g],  $t$  is an adsorption process time (interfacial contact) [min],  $K_{i\ diff}$  is a rate constant for intraparticle diffusion [mg/(g · min<sup>0.5</sup>)], and  $C$  is a constant of the Weber and Morris model [mg/g].

Based on the value of the rate constant for intraparticle diffusion  $K_{i\ diff}$ , the value of  $D$  – intraparticle diffusion coefficient – can be determined from the formula (S6):

$$K_{i\ diff} = \frac{6 \cdot q_e}{r \cdot \left(\frac{D}{\pi}\right)^{0.5}} K_{i\ diff} t^{0.5} \quad (S6)$$

where <sup>83</sup>:  $r$  – is a radius of adsorbent particle [cm],  $D$  is an intraparticle diffusion coefficient [cm<sup>2</sup>/min], and  $q_e$  is the adsorption capacity at equilibrium [mg/g].

Table S2. Kinetic parameter values for phosphates(V) adsorption on the cerium-modified chitosan-based hydrogel at temperature 20±1°C, experimentally determined composite adsorbent capacity was 9.61 mg/g.

| Pseudo-first-order kinetic model                         |                    |        |
|----------------------------------------------------------|--------------------|--------|
| $q_1$ (mg/g)                                             | $k_1$ (g/(mg · h)) | $R^2$  |
| 5.98                                                     | 0.0012             | 0.9224 |
| Pseudo-second-order kinetic model                        |                    |        |
| $q_2$ (mg/g)                                             | $k_2$ (g/(mg · h)) | $R^2$  |
| 9.75                                                     | 0.0012             | 0.9985 |
| Formal Weber-Morris model (similar to <sup>77,85</sup> ) |                    |        |

|                                             |                                                          |          |
|---------------------------------------------|----------------------------------------------------------|----------|
| $C_1$ (mg/g)                                | $K_{i \text{ diff } (1)}$ (g/(mg · min <sup>0.5</sup> )) | $R^2$    |
| 0.43003                                     | 0.43973                                                  | 0.915179 |
| Weber-Morris model, intraparticle diffusion |                                                          |          |
| $C_2$ (mg/g)                                | $K_{i \text{ diff } (2)}$ (g/(mg · min <sup>0.5</sup> )) | $R^2$    |
| 5.74992                                     | 0.07703                                                  | 0.966132 |

### ***Isotherms***<sup>91-94</sup>

#### **Langmuir model**

$$q_e = \frac{q_m K_L C_e}{1 + K_L C_e} \quad (\text{S7})$$

where:

$q_e$  – equilibrium surface concentration of the adsorbate (mass ratio) on adsorbent, mg/g  
 $q_m$  – maximum surface concentration of the adsorbate (single-layer adsorption) (mass ratio) on adsorbent, mg/g  
 $K_L$  – Langmuir isotherm constant, dm<sup>3</sup>/mg  
 $C_e$  – equilibrium concentration of adsorbate in the solution, mg/dm<sup>3</sup>

$$R_L = \frac{1}{1 + K_L C_0} \quad (\text{S8})$$

where:

$R_L$  – separation factor (equilibrium parameter)  
 $C_0$  – the highest initial concentration of adsorbate in the solution, mg/dm<sup>3</sup>

#### **Freundlich model**

$$q_e = K_F C_e^{1/n} \quad (\text{S9})$$

where:

$K_F$  – Freundlich isotherm constant, (dm<sup>3</sup>/mg)<sup>1/n</sup>  
 $1/n$  – exponent of the Freundlich isotherm model (representing adsorption intensity or adsorbent surface heterogeneity)

#### **Redlich-Peterson model**

$$q_e = \frac{K_{RP} C_e}{1 + a_{RP} C_e^g} \quad (\text{S10})$$

where:

$K_{RP}$  – Redlich-Peterson isotherm constant, (dm<sup>3</sup>/mg)(mg/g) = (dm<sup>3</sup>/g)  
 $a_{RP}$  – Redlich-Peterson model parameter, (dm<sup>3</sup>/mg)<sup>g</sup>  
 $g$  – Redlich-Peterson model exponent

#### **Jovanović model**

$$q_e = q_J [1 - \exp(-K_J C_e)] \quad (\text{S11})$$

where:

$q_J$  – maximum surface concentration of the adsorbate (single-layer adsorption) (mass ratio) on the adsorbent, mg/g  
 $K_J$  – Jovanović isotherm constant, dm<sup>3</sup>/mg

## Hill model

$$q_e = \frac{q_H C_e^{n_H}}{K_H + C_e^{n_H}} \quad (\text{S12})$$

where:

$q_H$  - maximum surface concentration of the adsorbate (mass ratio) on adsorbent, (mg/g)(dm<sup>3</sup>/mg)<sup>n<sub>H</sub></sup>

$n_H$  – exponent of the Hill model theoretically associated with binding interaction

$K_H$  –Hill model constant, (mg/dm<sup>3</sup>)<sup>n<sub>H</sub></sup>

Table S3. Adsorption isotherm models with their parameter values identified experimentally for phosphates(V) adsorption on the cerium-modified chitosan-based hydrogel adsorbent (20 ± 1°C).

| No | Model            | Equation                                      | Parameters                                                                                                                                                       |
|----|------------------|-----------------------------------------------|------------------------------------------------------------------------------------------------------------------------------------------------------------------|
| 1  | Langmuir         | $q_e = \frac{q_m K_L C_e}{1 + K_L C_e}$       | $q_m = 38.553 \text{ mg/g}$<br>$K_L = 0.075 \text{ dm}^3/\text{mg}$<br>$R^2 = 0.943$                                                                             |
| 2  | Freundlich       | $q_e = K_F C_e^{1/n}$                         | $K_F = 8.832 (\text{dm}^3/\text{mg})^{1/n}$<br>$1/n = 0.261$<br>$R^2 = 0.951$                                                                                    |
| 3  | Redlich-Peterson | $q_e = \frac{K_{RP} C_e}{1 + a_{RP} C_e^g}$   | $K_{RP} = 20.957 (\text{dm}^3/\text{mg})(\text{mg/g})$<br>$= (\text{dm}^3/\text{g})$<br>$a_{RP} = 1.711 (\text{dm}^3/\text{mg})^g$<br>$g = 0.799$<br>$R^2=0.981$ |
| 4  | Jovanović        | $q_e = q_J [1 - \exp(-K_J C_e)]$              | $q_J = 35.594 \text{ mg/g}$<br>$K_J = 0.053 \text{ dm}^3/\text{mg}$<br>$R^2 = 0.901$                                                                             |
| 5  | Hill             | $q_e = \frac{q_H C_e^{n_H}}{K_H + C_e^{n_H}}$ | $q_H = 52.666 (\text{mg/g})(\text{dm}^3/\text{mg})^{n_H}$<br>$n_H = 0.511$<br>$K_H = 6.783 (\text{mg}/\text{dm}^3)^{n_H}$<br>$R^2 = 0.981$                       |

## Thermodynamics

The following equations were considered: (S13) & (S14)<sup>96</sup>:

$$\ln K_c = \frac{\Delta S^\circ}{R} - \frac{\Delta H^\circ}{RT} \quad (\text{S13})$$

$$\Delta G^\circ = \Delta H^\circ - T\Delta S^\circ \quad (\text{S14})$$

In both equations,  $\Delta G^\circ$  is the Gibbs free energy of adsorption,  $\Delta H^\circ$  is the enthalpy of adsorption,  $\Delta S^\circ$  is the entropy of a thermodynamic system under study,  $K_c$  is the adsorption equilibrium constant, and  $R$  is the universal gas constant (8.314 J/(mol · K)).

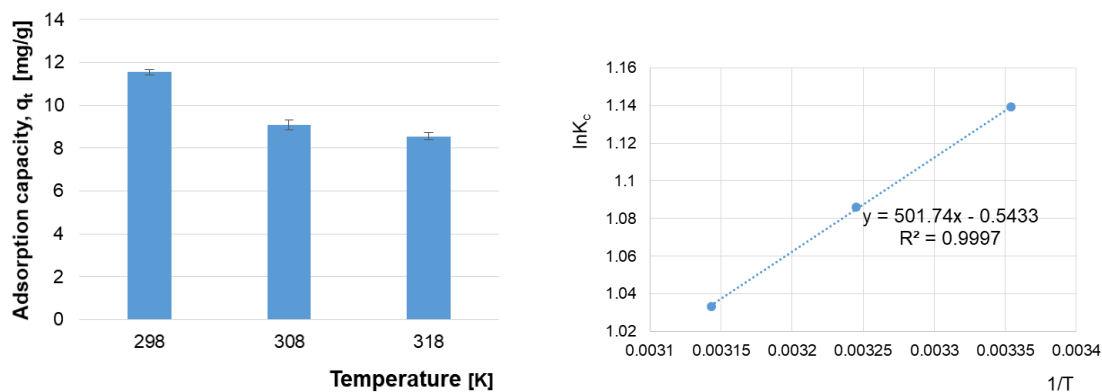

Figure S3. Effect of process temperature on phosphates(V) adsorption on cerium(IV)-modified chitosan-based hydrogel (left panel) and Arrhenius-type correlation between  $1/T$  and the adsorption equilibrium constant  $\ln K_c$  (right panel). Ce-CTS (20% wt. of cerium(IV)) hydrogel dose:  $20 \text{ g/dm}^3$ ; initial concentration of  $\text{P-PO}_4$ :  $9.3 \pm 0.1 \text{ mg/dm}^3$ ; pH: 7; contact time: 24 h; tested temperature: 298, 308 and 318 K.

Table S4. Thermodynamic parameter values corresponding to different adsorption process temperature values (298 – 318 K)

| $\Delta H^\circ$ [kJ/mol] | $\Delta S^\circ$ [kJ/(mol · K)] | $\Delta G^\circ$ [kJ/mol] |       |       |
|---------------------------|---------------------------------|---------------------------|-------|-------|
|                           |                                 | Temperature [K]           |       |       |
|                           |                                 | 298                       | 308   | 318   |
| -4.20                     | $-4.83 \cdot 10^{-3}$           | -2.76                     | -2.71 | -2.66 |
